# Supplementary material
Source: PubMed Central journal article supplement (PMC5952396)
Supplement: JB.00785-17_zjb999094747s1.pdf [file JB.00785-17_zjb999094747s1.pdf]

## Supplemental material

**TABLE S1.** Distribution of enzymes related to *de novo* and salvage pathways of NAD<sup>+</sup> in archaea.

|                                     | Organism                                  | Salvage                           |                                   | Salvage and <i>de novo</i>        |                                   | <i>De novo</i>                   |                                               |                                  |
|-------------------------------------|-------------------------------------------|-----------------------------------|-----------------------------------|-----------------------------------|-----------------------------------|----------------------------------|-----------------------------------------------|----------------------------------|
|                                     |                                           | Nm deamidase                      | NaPRT                             | NMNAT                             | NAD <sup>+</sup> synthetase       | QaPRT                            | Qa synthase                                   | Asp oxidase                      |
|                                     |                                           | TK1650 or MtPncA <sup>a</sup>     | TK1676                            | TK0067                            | TK1798                            | TK0218                           | TK0296                                        | TK0297 or TmNadX <sup>b</sup>    |
| Crenarchaeota                       | <i>Thermoproteus tenax</i>                |                                   | TTX_0495<br>WP_014126419.1(52%)   | TTX_0354<br>WP_014126286.1(44%)   | TTX_1283<br>WP_014127173.1(42%)   | TTX_0292<br>WP_014126225.1(48%)  | TTX_0294<br>WP_014126227.1(44%)               | TTX_0293<br>WP_014126226.1(40%)  |
|                                     |                                           |                                   |                                   | TTX_1599<br>WP_014127478.1(37%)   | TTX_0625<br>WP_014126542.1(42%)   | TTX_0251<br>WP_014126184.1(37%)  |                                               | TTX_0864<br>WP_014126775.1(32%)  |
|                                     |                                           |                                   |                                   |                                   |                                   |                                  |                                               | TTX_1104<br>WP_014127002.1(31%)  |
|                                     | <i>Pyrobaculum aerophilum</i>             | PAE3001<br>AAL64601.1(30%)*       | PAE2990<br>AAL64593.1(51%)        | PAE2259<br>AAL64068.1(43%)        |                                   | PAE3114<br>AAL64682.1(46%)       |                                               | PAE0716<br>AAL62973.1(32%)       |
|                                     | <i>Aeropyrum pernix</i>                   | APE_2350.1<br>BAA81363.2(30%)*    | APE_1273.1<br>BAA80263.2(50%)     |                                   |                                   |                                  |                                               | APE_0950.1<br>BAA79934.2(31%)    |
|                                     | <i>Sulfolobus acidocaldarius</i>          | Saci_0543<br>WP_011277441.1(25%)* | Saci_1470<br>WP_011278293.1(56%)  | Saci_0300<br>WP_011277218.1(41%)  | Saci_0009<br>WP_011276940.1(39%)  | Saci_0547<br>WP_011277445.1(46%) | Saci_0023 <sup>c</sup><br>WP_011276954.1(48%) | Saci_0549<br>WP_011277447.1(37%) |
|                                     |                                           |                                   |                                   |                                   |                                   |                                  |                                               | Saci_0982<br>WP_011277845.1(33%) |
|                                     | <i>Sulfolobus solfataricus</i>            | SSO2455(25%)* <sup>c</sup>        | SSO0354<br>WP_009990652.1(55%)    | SSO0255<br>WP_014511516.1(45%)    | SSO2172(38%)* <sup>c</sup>        | SSO0996<br>WP_009989246.1(47%)   | SSO0998<br>WP_009989240.1(49%)                | SSO0997<br>WP_009989244.1(39%)   |
|                                     |                                           |                                   |                                   |                                   |                                   |                                  | SSO2356<br>WP_009989496.1(32%)                |                                  |
| <i>Sulfolobus tokodaii</i>          | STK_05820<br>WP_010978560.1(28%)*         | STK_13760<br>WP_010979420.1(56%)  | STK_06480<br>WP_052846904.1(44%)  | STK_21590<br>WP_052847022.1(40%)  | STK_11980<br>WP_010979217.1(50%)  | STK_11970<br>WP_052846504.1(49%) | STK_11960<br>WP_010979215.1(36%)              |                                  |
|                                     |                                           |                                   |                                   |                                   |                                   |                                  | STK_04970<br>WP_010978474.1(32%)              |                                  |
| <i>Desulfurococcus amylolyticus</i> | Desfe_0074<br>WP_014766892.1(34%)         | Desfe_0973<br>WP_014767757.1(54%) | Desfe_1385<br>WP_014768139.1(44%) | Desfe_0092<br>WP_014766910.1(40%) |                                   |                                  |                                               |                                  |
|                                     |                                           |                                   | Desfe_0747<br>WP_014767544.1(42%) |                                   |                                   |                                  |                                               |                                  |
| Euryarchaeota                       | <i>Thermoplasma acidophilum</i>           | Ta0454<br>WP_010900881.1(33%)     | Ta1145<br>WP_010901554.1(50%)     | Ta0774<br>WP_048162318.1(47%)     | Ta0899<br>WP_010901309.1(44%)     |                                  | Ta1001<br>WP_010901412.1(29%)                 |                                  |
|                                     | <i>Thermoplasma volcanium</i>             | TVG0787823<br>WP_010917029.1(32%) | TVG1306677<br>BAB60408.1(49%)     | TVG0879099<br>WP_010917103.1(47%) | TVG1071522<br>WP_010917275.1(43%) |                                  | TVG0761794<br>WP_010917005.1(29%)             |                                  |
|                                     | <i>Archaeoglobus fulgidus</i><br>DSM 4304 | AF_2151<br>WP_010879640.1(41%)    | AF_0821<br>WP_010878324.1(54%)    | AF_2315<br>WP_010879804.1(51%)    | AF_1000<br>WP_010878500.1(48%)    | AF_1839<br>WP_010879333.1(51%)   |                                               | AF_0681<br>WP_010878184.1(31%)   |
|                                     |                                           |                                   | AF_1488<br>WP_010878985.1(39%)    |                                   |                                   |                                  | AF_1838<br>WP_010879332.1(39%)* <sup>f</sup>  |                                  |

## Supplemental material

|                                           |                                               |                                    |                                        |                                        |                                    |                                    |                                                     |
|-------------------------------------------|-----------------------------------------------|------------------------------------|----------------------------------------|----------------------------------------|------------------------------------|------------------------------------|-----------------------------------------------------|
| <i>Archaeoglobus fulgidus</i><br>DSM 8774 | AFULGI_00024210<br>WP_010879640.1(41%)        | AFULGI_00009070<br>AIG97699.1(54%) | AFULGI_00026150<br>WP_010879804.1(51%) | AFULGI_00010940<br>WP_010878500.1(48%) | AFULGI_00020950<br>AIG98839.1(51%) | AFULGI_00020930<br>AIG98837.1(48%) | AFULGI_00007610<br>WP_010878184.1(31%)              |
|                                           |                                               |                                    | AFULGI_00017400<br>WP_010878985.1(39%) |                                        |                                    | AFULGI_00020920<br>AIG98836.1(62%) | AFULGI_00020940<br>WP_010879332.1(39%) <sup>†</sup> |
| <i>Halobacterium salinarum</i>            | VNG_2537G<br>WP_010903898.1(29%) <sup>*</sup> | VNG_2541C<br>AAG20598.1(50%)       | VNG_0301C<br>WP_010902177.1(46%)       | VNG_2031G<br>WP_010903494.1(41%)       | VNG_1884G<br>WP_010903380.1(42%)   | VNG_1882G<br>WP_049892521.1(32%)   | VNG_1883G<br>WP_010903379.1(32%)                    |
|                                           | VNG_1100C<br>WP_010902791.1(35%) <sup>*</sup> |                                    |                                        |                                        |                                    |                                    | VNG_1306G<br>WP_010902947.1(32%)                    |
| <i>Methanosarcina mazei</i>               |                                               |                                    | MM_0626<br>AAM30322.1(49%)             | MM_0446WP_01103239<br>9.1(45%)         | MM_2070WP_01103400<br>2.1(48%)     | MM_2073WP_01103400<br>5.1(49%)     | MM_2072AAM31768.1(38%) <sup>†</sup>                 |
|                                           |                                               |                                    |                                        | MM_0612<br>WP_011032563.1(28%)         | MM_1577<br>AAM31273.1(31%)         |                                    |                                                     |
| <i>Methanosarcina acetivorans</i>         |                                               |                                    | MA_3731<br>WP_048065785.1(47%)         | MA_3526<br>WP_011023442.1(47%)         | MA_0955<br>WP_011020993.1(48%)     | MA_0959<br>WP_011020997.1(49%)     | MA_0958<br>WP_011020996.1(38%) <sup>†</sup>         |
| <i>Thermococcus onnurineus</i>            | TON_1968<br>WP_012570973.1(82%)               | TON_1362<br>WP_012572324.1(88%)    | TON_1164<br>WP_012572124.1(94%)        | TON_1770<br>WP_012572732.1(78%)        | TON_1889<br>WP_012572852.1(86%)    | TON_1887<br>WP_012572850.1(86%)    | TON_1885<br>WP_012572848.1(75%)                     |
| <i>Thermococcus litoralis</i>             | OCC_10179<br>WP_004066119.1(77%)              | OCC_06996<br>WP_004067753.1(89%)   | OCC_07636<br>WP_004066969.1(83%)       | OCC_12951<br>WP_004070194.1(72%)       | OCC_06601<br>WP_004067606.1(74%)   | OCC_06606<br>WP_004067607.1(79%)   | OCC_06611<br>WP_004067610.1(72%)                    |
| <i>Pyrococcus furiosus</i>                | PF1105<br>WP_011012244.1(86%)                 | PF1904<br>WP_011013044.1(83%)      | PF0458<br>WP_011011575.1(86%)          | PF0098<br>WP_011011210.1(69%)          | PF1978<br>WP_011013120.1(78%)      | PF1977<br>WP_011013119.1(83%)      | PF1976<br>WP_011013118.1(68%)                       |
| <i>Pyrococcus abyssi</i>                  | PAB1720<br>WP_010868100.1(85%)                | PAB1131<br>WP_010868844.1(83%)     | PAB1318<br>WP_010868691.1(86%)         | PAB2244<br>WP_010867289.1(76%)         | PAB2347<br>WP_010867134.1(84%)     | PAB2345<br>WP_048146454.1(86%)     | PAB2343<br>WP_048147208.1(67%)                      |
| <i>Pyrococcus horikoshii</i>              | PH0999<br>WP_010885086.1(86%)                 | PH1868<br>BAA30990.1(81%)          | PH0464<br>WP_010884571.1(85%)          | PH0182<br>WP_010884291.1(73%)          | PH0011<br>WP_048053010.1(82%)      | PH0013<br>WP_010884133.1(84%)      | PH0015<br>WP_048053535.1(67%)                       |
| <i>Methanocaldococcus jannaschii</i>      |                                               |                                    | MJ0541<br>WP_010870045.1(55%)          | MJ1352<br>WP_064496806.1(50%)          | MJ0493<br>WP_010869994.1(50%)      | MJ0407<br>WP_064496486.1(54%)      | MJ0033<br>WP_010869524.1(31%)                       |
|                                           |                                               |                                    |                                        |                                        |                                    |                                    | MJ0915<br>WP_010870429.1(38%) <sup>†</sup>          |
| <i>Methanococcus maripaludis</i>          |                                               |                                    | MMP1578<br>WP_011171522.1(45%)         | MMP1349<br>WP_011171293.1(47%)         | MMP0877<br>WP_011170821.1(39%)     | MMP1242<br>WP_011171186.1(53%)     | MMP1277<br>WP_011171221.1(31%)                      |
|                                           |                                               |                                    |                                        |                                        |                                    |                                    | MMP0737<br>WP_011170681.1(34%) <sup>†</sup>         |

Gene numbers, accession numbers and identities based on the results of BLAST searches. Unless indicated otherwise, BLAST searches were performed with protein sequences from *T. kodakarensis* involved in NAD<sup>+</sup> biosynthesis.

<sup>a</sup>Nicotinamide deamidase from the bacterium *Mycobacterium tuberculosis* (MtPncA) was also used in the BLAST search. Proteins identified in the search are indicated with asterisks.

<sup>b</sup>Aspartic acid dehydrogenase from the bacterium *Thermotoga maritima* (TmNadX) was also used in the BLAST search. Proteins identified in the search are indicated with daggers.

<sup>c</sup>Sequences identified with BLAST searches at Kyoto Encyclopedia of Genes and Genomes (KEGG). These sequences were not present in the NCBI database. Identity values were determined manually after alignment.

**TABLE S2.** Primers used in this study.

| No. | Primer name  | Sequence (5'-3')                    |
|-----|--------------|-------------------------------------|
| 1   | eTK1676-F    | AAGGAGATATACATATGCGCGACTTCTACATTGC  |
| 2   | eTK1676-R    | GCTCGAATTCGGATCTCAATCAATGCTCAAGTTG  |
| 3   | dTK0218-F    | TCATCTCCCGGAACTTCCTCCGGAGGTCTT      |
| 4   | dTK0218-R    | AACGATAGCCTTCGCCATCTTCGGCGGGTTG     |
| 5   | dTK1650-F    | CCCCTTAGTCTGGACTCTTACTGCTCTCT       |
| 6   | dTK1650-R    | CTGACTAAATAAATCCTCCGGGAAAACATG      |
| 7   | dTK1676-F    | CGGTCTTGCTGCTATTGCCGCGTTGG          |
| 8   | dTK1676-R    | GCGCGTTAAGGCCCCGAGCGTGTGGAGCA       |
| 9   | invdTK0218-F | TGAACTTTTTTCGCTCTTCGCCAATACTTT      |
| 10  | invdTK0218-R | CACTCTCACCAGTTCTCACTCTAGTTCTCT      |
| 11  | invdTK1650-F | TACCCTCCACGATGAGCTTCCCAGTCTT        |
| 12  | invdTK1650-R | TCAGGCTCGTCCCAGTGGTTGACGG           |
| 13  | invdTK1676-F | GCGTCTTCTTTTCTTGTTTTCTTTATCTCTTTTTG |
| 14  | invdTK1676-R | GGTTCTCACCTTGAAAATAGTTAAGCCC        |
| 15  | idTK0218-F   | ATGGTTCCGCTCGAGTATCTGCTCAGGTT       |
| 16  | idTK0218-R   | TCAAAGCCTGCCAATTATCTCAAGGCTTA       |
| 17  | idTK1650-F   | ATGCCGAAGGAGGCCCTCATAGTTGTT         |
| 18  | idTK1650-R   | TGCCCTTAACTGCATCGCTCAGGAGGT         |
| 19  | idTK1676-F   | ATGCGCGACTTCTACATTGCCCATGAGGA       |
| 20  | idTK1676-R   | TCAATCAATGCTCAAGTTGAGCTTCTTCG       |
| 21  | odTK0218-F   | TACCCTCCACGATGAGCTTCCCAGTCTT        |
| 22  | odTK0218-R   | TCAGGCTCGTCCCAGTGGTTGACGG           |
| 23  | odTK1650-F   | AGAAGAATTCCGTAAAAGTGAGAAG           |
| 24  | odTK1650-R   | CATCCCAACCACCGGGAGGTTTTTAT          |
| 25  | odTK1676-F   | TGGCATTCCGCTGGGGGCAGTTATCAAGAG      |
| 26  | odTK1676-R   | GCCAGCACAGACCATCCCCTGGGGAATCGA      |

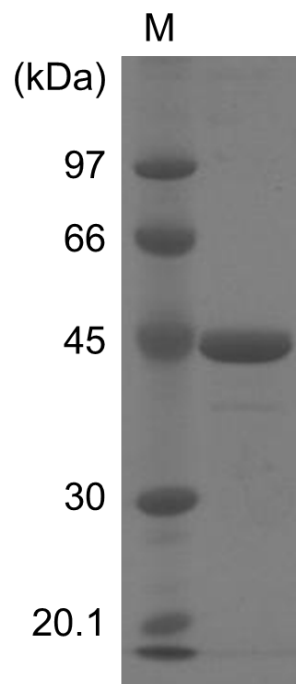

**FIG S1.** Purification of the recombinant TK1676 protein. Purified TK1676 protein (4  $\mu$ g) was applied and separated by SDS-PAGE and stained with Coomassie Brilliant Blue. M: molecular mass marker.

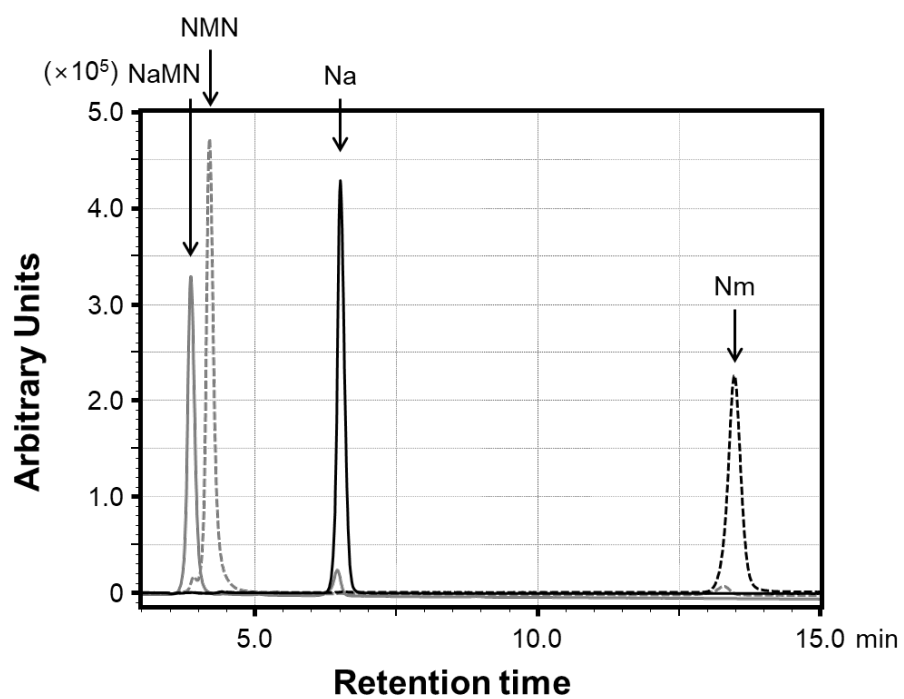

**FIG S2.** HPLC chromatograms of standard compounds. Standard compounds (2 mM) were analyzed by HPLC. Black solid, black dashed, gray solid and gray dashed lines correspond to Na, Nm, NaMN and NMN standards, respectively.

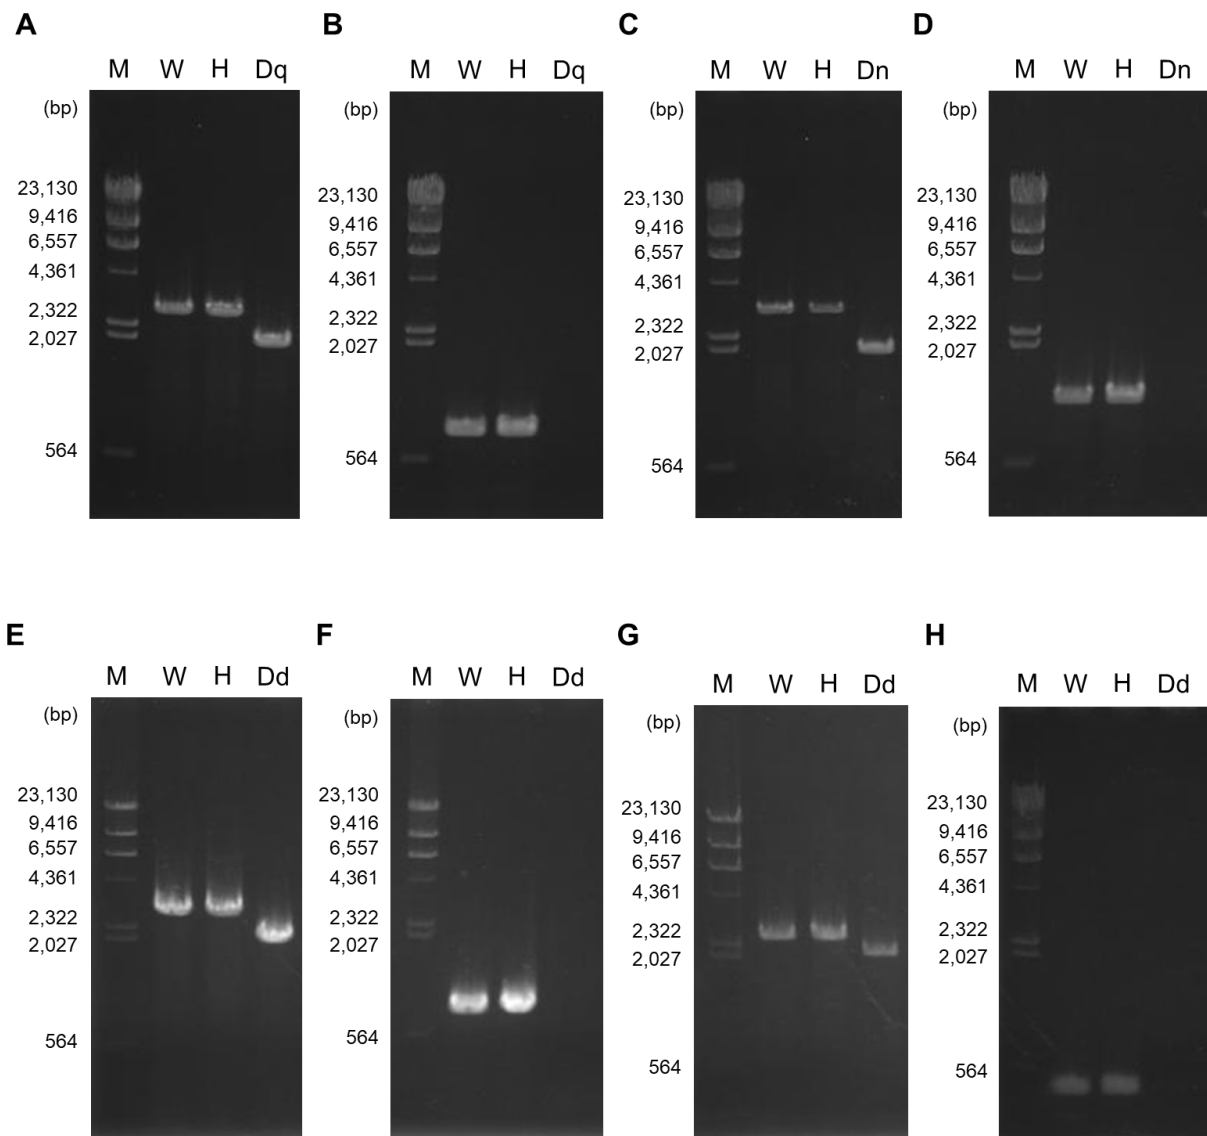

**FIG S3.** Genotypic analyses of the gene disruption strains by PCR. PCR analyses of the TK0218 and TK1676 gene disruption strains were performed with primer sets that anneal outside of the TK0218-flanking regions (A) and TK1676-flanking regions (C) for homologous recombination and within the TK0218 (B) and TK1676 (D) genes. PCR analyses of the  $\Delta$ TK0218 $\Delta$ TK1650 double gene disruption strain were performed with primer sets that anneal outside of the TK0218- and TK1650-flanking regions for homologous recombination (E and G) and within the TK0218 and TK1650 genes (F and H). Abbreviations: M; marker, W; *T. kodakarensis* wild-type KOD1, H; the host strain KU216, Dq; the  $\Delta$ TK0218 strain, Dn; the  $\Delta$ TK1676 strain, Dd; the  $\Delta$ TK0218 $\Delta$ TK1650 strain.
